# Supplementary material for: Mapping National Plant Biodiversity Patterns in South Korea with the MARS Species Distribution Model
Source: PubMed Central journal article supplement (PMC4773094; doi:10.1371/journal.pone.0149511), 2016-03-01
Supplement: pone.0149511.s006.pdf [file pone.0149511.s006.pdf]

**S2 Table. Elevation variations on each species occurrence points between 30 m and 1 km elevation rasters, and distance between points for each species.**

S2 Table 1. The variation in elevation of each species' occurrence points between 30 m and 1 km elevation rasters.

| <i>species</i>                                     | <i>30m<br/>Minimum<br/>Elevation<br/>(m)</i> | <i>1km<br/>Minimum<br/>Elevation<br/>(m)</i> | <i>30m<br/>Maximum<br/>Elevation<br/>(m)</i> | <i>1km<br/>Maximum<br/>Elevation<br/>(m)</i> | <i>30m<br/>Elevation<br/>Range<br/>(m)</i> | <i>1km<br/>Elevation<br/>Range<br/>(m)</i> | <i>30m<br/>Mean<br/>Elevation<br/>(m)</i> | <i>1km<br/>Mean<br/>Elevation<br/>(m)</i> |
|----------------------------------------------------|----------------------------------------------|----------------------------------------------|----------------------------------------------|----------------------------------------------|--------------------------------------------|--------------------------------------------|-------------------------------------------|-------------------------------------------|
| <i>Abelia coreana</i>                              | 286                                          | 302                                          | 1388                                         | 1290                                         | 1102                                       | 988                                        | 780                                       | 746                                       |
| <i>Abies koreana</i>                               | 1324                                         | 1139                                         | 1338                                         | 1229                                         | 14                                         | 90                                         | 1329                                      | 1169                                      |
| <i>Acanthopanax chiisanensis</i>                   | 382                                          | 340                                          | 1193                                         | 1081                                         | 811                                        | 741                                        | 730                                       | 708                                       |
| <i>Acer barbinerve</i>                             | 614                                          | 690                                          | 1403                                         | 1427                                         | 789                                        | 737                                        | 974                                       | 970                                       |
| <i>Acer mono</i>                                   | 226                                          | 222                                          | 337                                          | 503                                          | 111                                        | 281                                        | 287                                       | 397                                       |
| <i>Acer tegmentosum</i>                            | 374                                          | 478                                          | 1372                                         | 1218                                         | 998                                        | 739                                        | 885                                       | 894                                       |
| <i>Acer ukurunduense</i>                           | 704                                          | 775                                          | 1295                                         | 1223                                         | 591                                        | 448                                        | 1031                                      | 1038                                      |
| <i>Aconitum chiisanense</i>                        | 429                                          | 551                                          | 738                                          | 615                                          | 309                                        | 64                                         | 584                                       | 583                                       |
| <i>Aconitum koreanum</i>                           | 340                                          | 327                                          | 955                                          | 794                                          | 615                                        | 467                                        | 529                                       | 525                                       |
| <i>Aconitum trilobum</i>                           | 381                                          | 355                                          | 665                                          | 689                                          | 284                                        | 333                                        | 498                                       | 533                                       |
| <i>Adenophora grandiflora</i>                      | 1125                                         | 1151                                         | 1410                                         | 1288                                         | 285                                        | 137                                        | 1268                                      | 1220                                      |
| <i>Aegopodium alpestre</i>                         | 841                                          | 754                                          | 1310                                         | 1237                                         | 469                                        | 483                                        | 1076                                      | 995                                       |
| <i>Ajuga spectabilis</i>                           | 415                                          | 339                                          | 933                                          | 869                                          | 518                                        | 530                                        | 653                                       | 570                                       |
| <i>Allium senescens</i>                            | 277                                          | 354                                          | 1250                                         | 1134                                         | 973                                        | 780                                        | 659                                       | 573                                       |
| <i>Allium victorialis</i> var. <i>platyphyllum</i> | 1098                                         | 1167                                         | 1354                                         | 1229                                         | 256                                        | 62                                         | 1226                                      | 1198                                      |
| <i>Anemone koraiensis</i>                          | 393                                          | 442                                          | 1487                                         | 1427                                         | 1094                                       | 986                                        | 938                                       | 939                                       |
| <i>Anemone narcissiflora</i>                       | 767                                          | 801                                          | 1321                                         | 1210                                         | 554                                        | 409                                        | 1063                                      | 1011                                      |
| <i>Anemone reflexa</i>                             | 301                                          | 371                                          | 1437                                         | 1330                                         | 1136                                       | 959                                        | 785                                       | 783                                       |
| <i>Angelica gigas</i>                              | 361                                          | 320                                          | 1135                                         | 1102                                         | 774                                        | 782                                        | 835                                       | 810                                       |
| <i>Angelica tenuissima</i>                         | 954                                          | 776                                          | 1178                                         | 1082                                         | 224                                        | 305                                        | 1040                                      | 934                                       |
| <i>Arisaema heterophyllum</i>                      | 198                                          | 348                                          | 697                                          | 569                                          | 499                                        | 221                                        | 402                                       | 430                                       |
| <i>Aristolochia contorta</i>                       | 127                                          | 179                                          | 605                                          | 657                                          | 478                                        | 478                                        | 329                                       | 376                                       |
| <i>Aristolochia manshuriensis</i>                  | 226                                          | 289                                          | 1089                                         | 1152                                         | 863                                        | 864                                        | 638                                       | 668                                       |
| <i>Asarum maculatum</i>                            | 274                                          | 287                                          | 885                                          | 724                                          | 611                                        | 437                                        | 580                                       | 505                                       |
| <i>Astragalus membranaceus</i>                     | 289                                          | 288                                          | 624                                          | 746                                          | 335                                        | 458                                        | 433                                       | 495                                       |
| <i>Berchemia berchemiaefolia</i>                   | 163                                          | 261                                          | 610                                          | 612                                          | 447                                        | 351                                        | 351                                       | 427                                       |
| <i>Bistorta alopecuroides</i>                      | 439                                          | 316                                          | 731                                          | 560                                          | 292                                        | 244                                        | 585                                       | 438                                       |
| <i>Bupleurum euphorbioides</i>                     | 593                                          | 413                                          | 1192                                         | 1003                                         | 599                                        | 591                                        | 867                                       | 799                                       |
| <i>Bupleurum falcatum</i>                          | 251                                          | 149                                          | 963                                          | 908                                          | 712                                        | 759                                        | 660                                       | 560                                       |
| <i>Buxus microphylla</i> var. <i>koreana</i>       | 246                                          | 231                                          | 671                                          | 615                                          | 425                                        | 385                                        | 357                                       | 404                                       |
| <i>Calanthe discolor</i>                           | 149                                          | 199                                          | 252                                          | 222                                          | 103                                        | 24                                         | 201                                       | 210                                       |
| <i>Campylotropis macrocarpa</i>                    | 197                                          | 190                                          | 461                                          | 424                                          | 264                                        | 235                                        | 294                                       | 316                                       |
| <i>Cardamine koreana</i>                           | 354                                          | 378                                          | 982                                          | 930                                          | 628                                        | 552                                        | 645                                       | 683                                       |
| <i>Cardamine lyrata</i>                            | 815                                          | 841                                          | 865                                          | 841                                          | 50                                         | 0                                          | 840                                       | 841                                       |
| <i>Carex kujujana</i>                              | 160                                          | 91                                           | 273                                          | 377                                          | 113                                        | 286                                        | 228                                       | 276                                       |
| <i>Carex ligulata</i> var. <i>austrokoreensis</i>  | 49                                           | 186                                          | 309                                          | 405                                          | 260                                        | 219                                        | 179                                       | 296                                       |
| <i>Carpinus coreana</i>                            | 358                                          | 214                                          | 365                                          | 252                                          | 7                                          | 38                                         | 362                                       | 233                                       |
| <i>Celtis choseniana</i>                           | 183                                          | 172                                          | 965                                          | 804                                          | 782                                        | 632                                        | 574                                       | 543                                       |
| <i>Cephalotaxus koreana</i>                        | 215                                          | 312                                          | 487                                          | 487                                          | 272                                        | 175                                        | 363                                       | 429                                       |
| <i>Chionanthus retusa</i>                          | 113                                          | 115                                          | 128                                          | 124                                          | 15                                         | 9                                          | 121                                       | 120                                       |
| <i>Chrysosplenium ramosum</i>                      | 349                                          | 441                                          | 1024                                         | 1095                                         | 675                                        | 653                                        | 775                                       | 866                                       |
| <i>Cimicifuga heracleifolia</i>                    | 182                                          | 189                                          | 1446                                         | 1351                                         | 1264                                       | 1161                                       | 742                                       | 721                                       |
| <i>Cirsium chanroenicum</i>                        | 403                                          | 434                                          | 1084                                         | 962                                          | 681                                        | 527                                        | 773                                       | 724                                       |
| <i>Cirsium setidens</i>                            | 233                                          | 263                                          | 711                                          | 631                                          | 478                                        | 368                                        | 433                                       | 400                                       |
| <i>Cirsium vlassovianum</i>                        | 511                                          | 537                                          | 1032                                         | 911                                          | 521                                        | 374                                        | 845                                       | 767                                       |
| <i>Clematis brachyura</i>                          | 310                                          | 312                                          | 444                                          | 358                                          | 134                                        | 46                                         | 355                                       | 335                                       |

|                                                      |      |      |      |      |      |      |      |      |
|------------------------------------------------------|------|------|------|------|------|------|------|------|
| <i>Clematis chiisanensis</i>                         | 335  | 341  | 1540 | 1371 | 1205 | 1029 | 961  | 927  |
| <i>Clematis patens</i>                               | 160  | 177  | 907  | 856  | 747  | 679  | 357  | 363  |
| <i>Clintonia udensis</i>                             | 373  | 352  | 1222 | 1179 | 849  | 827  | 976  | 879  |
| <i>Cnidium tachiroei</i>                             | 407  | 442  | 1251 | 1179 | 844  | 737  | 773  | 751  |
| <i>Codonopsis lanceolata</i>                         | 151  | 132  | 1087 | 1042 | 936  | 910  | 560  | 564  |
| <i>Convallaria keiskei</i>                           | 298  | 296  | 896  | 776  | 598  | 480  | 494  | 430  |
| <i>Corydalis grandicalyx</i>                         | 1310 | 1237 | 1471 | 1325 | 161  | 88   | 1391 | 1281 |
| <i>Corydalis maculata</i>                            | 287  | 392  | 866  | 917  | 579  | 525  | 656  | 708  |
| <i>Corylopsis coreana</i>                            | 224  | 273  | 1114 | 1232 | 890  | 959  | 639  | 648  |
| <i>Crataegus komarovii</i>                           | 193  | 229  | 450  | 490  | 257  | 261  | 322  | 360  |
| <i>Cremastra appendiculata</i>                       | 260  | 279  | 274  | 366  | 14   | 86   | 269  | 319  |
| <i>Crypsinus hastatus</i>                            | 102  | 159  | 346  | 441  | 244  | 282  | 200  | 300  |
| <i>Cymbidium goeringii</i>                           | 188  | 118  | 296  | 319  | 108  | 201  | 234  | 187  |
| <i>Cymbidium nipponicum</i>                          | 221  | 296  | 389  | 319  | 168  | 23   | 305  | 308  |
| <i>Cypripedium macranthum</i>                        | 268  | 219  | 1343 | 1229 | 1075 | 1010 | 798  | 756  |
| <i>Daphne kamschatica</i>                            | 731  | 657  | 830  | 913  | 99   | 256  | 790  | 816  |
| <i>Delphinium maackianum</i>                         | 858  | 756  | 915  | 778  | 57   | 22   | 887  | 767  |
| <i>Deutzia coreana</i>                               | 285  | 403  | 557  | 503  | 272  | 100  | 415  | 455  |
| <i>Deutzia paniculata</i>                            | 339  | 375  | 717  | 575  | 378  | 199  | 528  | 475  |
| <i>Dianthus superbus</i> var. <i>longicalycinus</i>  | 358  | 312  | 838  | 816  | 480  | 503  | 601  | 546  |
| <i>Dicentra spectabilis</i>                          | 144  | 147  | 876  | 879  | 732  | 732  | 459  | 526  |
| <i>Dipsacus japonicus</i>                            | 305  | 484  | 926  | 707  | 621  | 223  | 579  | 554  |
| <i>Disporum ovale</i>                                | 314  | 322  | 1347 | 1229 | 1033 | 907  | 969  | 916  |
| <i>Disporum sessile</i>                              | 181  | 222  | 698  | 625  | 517  | 402  | 402  | 380  |
| <i>Dryopteris crassirhizoma</i>                      | 339  | 337  | 897  | 970  | 558  | 634  | 575  | 552  |
| <i>Echinosophora koreensis</i>                       | 338  | 383  | 533  | 418  | 195  | 34   | 436  | 401  |
| <i>Epimedium koreanum</i>                            | 40   | 44   | 806  | 629  | 766  | 586  | 357  | 324  |
| <i>Equisetum hyemale</i>                             | 579  | 653  | 1104 | 1081 | 525  | 428  | 859  | 927  |
| <i>Eranthis stellata</i>                             | 267  | 416  | 1295 | 1107 | 1028 | 691  | 757  | 784  |
| <i>Euonymus pauciflorus</i>                          | 214  | 152  | 1326 | 1178 | 1112 | 1026 | 674  | 618  |
| <i>Eurya japonica</i>                                | 162  | 77   | 424  | 408  | 262  | 331  | 249  | 228  |
| <i>Filipendula formosa</i>                           | 1053 | 933  | 1620 | 1512 | 567  | 580  | 1412 | 1284 |
| <i>Filipendula glaberrima</i>                        | 221  | 269  | 1532 | 1427 | 1311 | 1159 | 868  | 844  |
| <i>Forsythia ovata</i>                               | 441  | 356  | 1038 | 812  | 597  | 456  | 825  | 693  |
| <i>Forsythia saxatilis</i>                           | 127  | 254  | 404  | 452  | 277  | 198  | 288  | 328  |
| <i>Galium boreale</i> var. <i>vulgare</i>            | 213  | 180  | 575  | 438  | 362  | 258  | 333  | 322  |
| <i>Gastrodia elata</i>                               | 175  | 332  | 1258 | 1165 | 1083 | 833  | 591  | 569  |
| <i>Halenia corniculata</i>                           | 978  | 988  | 1202 | 1143 | 224  | 155  | 1076 | 1047 |
| <i>Hanabusaya asiatica</i>                           | 449  | 488  | 1320 | 1270 | 871  | 782  | 973  | 919  |
| <i>Hemerocallis middendorfil</i>                     | 906  | 796  | 1262 | 1084 | 356  | 288  | 1087 | 950  |
| <i>Hovenia dulcis</i>                                | 225  | 236  | 891  | 903  | 666  | 666  | 467  | 499  |
| <i>Hylomecon hylomeconoides</i>                      | 184  | 185  | 1322 | 1214 | 1138 | 1029 | 399  | 468  |
| <i>Ilex cornuta</i>                                  | 20   | 54   | 124  | 77   | 104  | 23   | 72   | 65   |
| <i>Ilex macropoda</i>                                | 116  | 172  | 920  | 845  | 804  | 672  | 606  | 589  |
| <i>Iris ensata</i> var. <i>spontanea</i>             | 285  | 287  | 955  | 741  | 670  | 454  | 592  | 525  |
| <i>Iris koreana</i>                                  | 615  | 565  | 931  | 926  | 316  | 361  | 773  | 745  |
| <i>Iris odaesanensis</i>                             | 246  | 359  | 1554 | 1427 | 1308 | 1068 | 871  | 842  |
| <i>Iris ruthenica</i>                                | 96   | 90   | 814  | 862  | 718  | 772  | 477  | 525  |
| <i>Iris savatieri</i>                                | 181  | 207  | 827  | 759  | 646  | 552  | 544  | 486  |
| <i>Isopyrum mandshuricum</i>                         | 287  | 389  | 521  | 597  | 234  | 209  | 404  | 493  |
| <i>Isopyrum raddeanum</i>                            | 820  | 891  | 1104 | 1013 | 284  | 121  | 948  | 951  |
| <i>Jeffersonia dubia</i>                             | 162  | 201  | 504  | 438  | 342  | 237  | 346  | 359  |
| <i>Kalopanax pictus</i>                              | 141  | 54   | 1242 | 1082 | 1101 | 1028 | 650  | 660  |
| <i>Koelreuteria paniculata</i>                       | 33   | 26   | 903  | 965  | 870  | 939  | 218  | 210  |
| <i>Larix gmelini</i> var. <i>principisruprechtii</i> | 596  | 466  | 737  | 719  | 141  | 253  | 667  | 592  |
| <i>Leontice microrhyncha</i>                         | 981  | 1057 | 1197 | 1178 | 216  | 121  | 1092 | 1097 |
| <i>Leontopodium coreanum</i>                         | 1109 | 998  | 1272 | 1135 | 163  | 138  | 1191 | 1067 |
| <i>Leontopodium japonicum</i>                        | 961  | 791  | 1221 | 1087 | 260  | 296  | 1125 | 990  |
| <i>Lilium callosum</i>                               | 320  | 355  | 386  | 465  | 66   | 110  | 353  | 410  |

|                                                  |      |     |      |      |      |      |      |      |
|--------------------------------------------------|------|-----|------|------|------|------|------|------|
| <i>Lilium cernum</i>                             | 529  | 465 | 1310 | 1189 | 781  | 724  | 892  | 779  |
| <i>Lilium distichum</i>                          | 150  | 177 | 1280 | 1184 | 1130 | 1007 | 766  | 730  |
| <i>Lonicera chrysantha</i>                       | 365  | 355 | 1543 | 1419 | 1178 | 1064 | 873  | 868  |
| <i>Lonicera harai</i>                            | 466  | 642 | 802  | 716  | 336  | 74   | 634  | 668  |
| <i>Lonicera sachalinensis</i>                    | 468  | 558 | 1274 | 1210 | 806  | 652  | 871  | 884  |
| <i>Lonicera subhispida</i>                       | 425  | 452 | 564  | 579  | 139  | 127  | 497  | 517  |
| <i>Lonicera subsessilis</i>                      | 263  | 289 | 1205 | 1154 | 942  | 865  | 700  | 679  |
| <i>Lonicera vesicaria</i>                        | 998  | 969 | 1352 | 1203 | 354  | 234  | 1189 | 1058 |
| <i>Loranthus tanakae</i>                         | 740  | 713 | 978  | 878  | 238  | 165  | 859  | 795  |
| <i>Lysimachia coreana</i>                        | 224  | 283 | 1164 | 1143 | 940  | 860  | 641  | 646  |
| <i>Machilus thunbergii</i>                       | 64   | 125 | 262  | 384  | 198  | 259  | 149  | 236  |
| <i>Magnolia kobus</i>                            | 77   | 115 | 198  | 216  | 121  | 101  | 138  | 166  |
| <i>Megaleranthis saniculifolia</i>               | 363  | 365 | 991  | 1007 | 628  | 642  | 793  | 823  |
| <i>Melampyrum setaceum</i> var. <i>nakaianum</i> | 469  | 423 | 989  | 936  | 520  | 513  | 767  | 753  |
| <i>Moehringia lateriflora</i>                    | 333  | 333 | 761  | 757  | 428  | 424  | 524  | 580  |
| <i>Monotropa hypopithys</i>                      | 220  | 209 | 602  | 606  | 382  | 397  | 474  | 402  |
| <i>Monotropa uniflora</i>                        | 619  | 545 | 1250 | 1184 | 631  | 640  | 1011 | 928  |
| <i>Nymphoides peltata</i>                        | 31   | 34  | 102  | 149  | 71   | 115  | 45   | 51   |
| <i>Oplonanax elatus</i>                          | 647  | 679 | 1666 | 1539 | 1019 | 860  | 1165 | 1147 |
| <i>Paeonia japonica</i>                          | 267  | 257 | 1013 | 921  | 746  | 665  | 677  | 637  |
| <i>Paeonia obovata</i>                           | 292  | 396 | 1270 | 1254 | 978  | 857  | 878  | 841  |
| <i>Patrinia saniculaefolia</i>                   | 170  | 132 | 1312 | 1229 | 1142 | 1098 | 896  | 822  |
| <i>Patrinia rupestris</i>                        | 487  | 413 | 1076 | 1031 | 589  | 618  | 719  | 686  |
| <i>Paulownia coreana</i>                         | 123  | 109 | 539  | 609  | 416  | 500  | 376  | 398  |
| <i>Phellodendron amurense</i>                    | 271  | 287 | 1048 | 1107 | 777  | 819  | 625  | 669  |
| <i>Pimpinella brachycarpa</i>                    | 761  | 648 | 921  | 1030 | 160  | 383  | 841  | 839  |
| <i>Pinellia tripartita</i>                       | 237  | 203 | 456  | 408  | 219  | 205  | 347  | 305  |
| <i>Pinus pumila</i>                              | 1174 | 921 | 1669 | 1481 | 495  | 561  | 1422 | 1201 |
| <i>Pleuropterus cilinervis</i>                   | 212  | 222 | 510  | 366  | 298  | 144  | 361  | 294  |
| <i>Poa viridula</i>                              | 307  | 231 | 379  | 378  | 72   | 147  | 343  | 305  |
| <i>Polygonatum stenophyllum</i>                  | 243  | 302 | 333  | 344  | 90   | 42   | 278  | 329  |
| <i>Populus maximowiczii</i>                      | 279  | 343 | 657  | 710  | 378  | 367  | 452  | 530  |
| <i>Prunus davidiana</i>                          | 140  | 193 | 754  | 664  | 614  | 471  | 422  | 425  |
| <i>Prunus maackii</i>                            | 463  | 511 | 1017 | 1107 | 554  | 596  | 767  | 835  |
| <i>Prunus yedoensis</i>                          | 97   | 105 | 404  | 452  | 307  | 347  | 163  | 195  |
| <i>Pulsatilla koreana</i>                        | 183  | 160 | 470  | 464  | 287  | 305  | 324  | 346  |
| <i>Quercus serrata</i>                           | 356  | 289 | 441  | 337  | 85   | 48   | 399  | 313  |
| <i>Ranunculus kazusensis</i>                     | 8    | 5   | 26   | 19   | 18   | 14   | 17   | 12   |
| <i>Rhamnus parvifolia</i>                        | 663  | 666 | 928  | 794  | 265  | 128  | 784  | 714  |
| <i>Rhododendron brachycarpum</i>                 | 1042 | 992 | 1343 | 1352 | 301  | 360  | 1224 | 1149 |
| <i>Rhododendron micranthum</i>                   | 229  | 198 | 1146 | 952  | 917  | 754  | 709  | 642  |
| <i>Rhododendron tschonoskii</i>                  | 953  | 799 | 1679 | 1539 | 726  | 740  | 1325 | 1212 |
| <i>Rodgersia podophylla</i>                      | 305  | 412 | 1383 | 1315 | 1078 | 903  | 821  | 816  |
| <i>Rosa davurica</i>                             | 337  | 378 | 1332 | 1246 | 995  | 868  | 835  | 812  |
| <i>Rosa marretii</i>                             | 716  | 775 | 1513 | 1427 | 797  | 652  | 1187 | 1148 |
| <i>Salvia chanroenica</i>                        | 335  | 352 | 744  | 683  | 409  | 332  | 538  | 516  |
| <i>Sanguisorba hakusanensis</i>                  | 966  | 776 | 1234 | 1232 | 268  | 455  | 1164 | 1062 |
| <i>Sanguisorba longifolia</i>                    | 306  | 145 | 1668 | 1539 | 1362 | 1394 | 816  | 735  |
| <i>Sapium japonicum</i>                          | 222  | 203 | 326  | 304  | 104  | 101  | 297  | 247  |
| <i>Saussurea calcicola</i>                       | 683  | 644 | 1366 | 1215 | 683  | 571  | 994  | 922  |
| <i>Saussurea eriophylla</i>                      | 324  | 338 | 517  | 501  | 193  | 163  | 421  | 420  |
| <i>Saxifraga punctata</i>                        | 500  | 380 | 1227 | 1228 | 727  | 848  | 762  | 826  |
| <i>Scabiosa mansenensis</i>                      | 190  | 192 | 804  | 908  | 614  | 716  | 548  | 551  |
| <i>Schizopepon bryoniaefolius</i>                | 508  | 551 | 1092 | 1057 | 584  | 506  | 834  | 892  |
| <i>Scopolia japonica</i>                         | 169  | 287 | 1006 | 942  | 837  | 655  | 579  | 606  |
| <i>Scrophularia koraiensis</i>                   | 1057 | 991 | 1315 | 1180 | 258  | 189  | 1199 | 1104 |
| <i>Sedum rotundifolium</i>                       | 106  | 184 | 547  | 694  | 441  | 510  | 374  | 445  |
| <i>Sedum zokuriense</i>                          | 523  | 423 | 991  | 823  | 468  | 400  | 757  | 623  |
| <i>Silene koreana</i>                            | 226  | 243 | 730  | 638  | 504  | 395  | 391  | 408  |

|                                                  |            |            |            |            |            |            |            |            |
|--------------------------------------------------|------------|------------|------------|------------|------------|------------|------------|------------|
| <i>Smilacina bicolor</i>                         | 1230       | 1237       | 1688       | 1512       | 458        | 276        | 1491       | 1382       |
| <i>Sorbus amurensis</i>                          | 367        | 451        | 1406       | 1351       | 1039       | 899        | 958        | 939        |
| <i>Sorbus commixta</i>                           | 305        | 402        | 1474       | 1310       | 1169       | 908        | 954        | 897        |
| <i>Spiraea miyabei</i>                           | 460        | 530        | 1003       | 988        | 543        | 458        | 689        | 778        |
| <i>Spiraea salicifolia</i>                       | 200        | 209        | 1158       | 1081       | 958        | 872        | 594        | 618        |
| <i>Stewartia koreana</i>                         | 192        | 258        | 1069       | 969        | 877        | 711        | 648        | 619        |
| <i>Symplocarpus nipponicus</i>                   | 269        | 286        | 1518       | 1354       | 1249       | 1068       | 886        | 899        |
| <i>Symplocarpus renifolius</i>                   | 215        | 236        | 1360       | 1289       | 1145       | 1053       | 764        | 760        |
| <i>Syneilesis palmata</i>                        | 349        | 332        | 371        | 358        | 22         | 25         | 360        | 345        |
| <i>Syringa velutina</i> var. <i>kamibayashii</i> | 594        | 387        | 1079       | 991        | 485        | 605        | 837        | 689        |
| <i>Syringa wolffi</i>                            | 217        | 310        | 1558       | 1427       | 1341       | 1116       | 1063       | 1023       |
| <i>Taxus cuspidata</i>                           | 440        | 338        | 1491       | 1427       | 1051       | 1089       | 1186       | 1086       |
| <i>Thalictrum coreanum</i>                       | 307        | 385        | 857        | 650        | 550        | 265        | 497        | 504        |
| <i>Thalictrum rochebrunianum</i>                 | 490        | 334        | 583        | 409        | 93         | 76         | 537        | 372        |
| <i>Thuja koraiensis</i>                          | 977        | 801        | 1676       | 1396       | 699        | 595        | 1175       | 1089       |
| <i>Thuja orientalis</i>                          | 187        | 223        | 1491       | 1343       | 1304       | 1120       | 505        | 449        |
| <i>Thymus quinquecostatus</i>                    | 384        | 557        | 964        | 730        | 580        | 173        | 642        | 622        |
| <i>Tilia taquetii</i>                            | 211        | 202        | 390        | 366        | 179        | 164        | 271        | 264        |
| <i>Torreya nucifera</i>                          | 95         | 153        | 351        | 382        | 256        | 228        | 224        | 284        |
| <i>Tricyrtis dilatata</i>                        | 114        | 109        | 905        | 972        | 791        | 863        | 394        | 400        |
| <i>Trientalis europaea</i>                       | 1209       | 1095       | 1232       | 1155       | 23         | 61         | 1221       | 1125       |
| <i>Trillium kamtschaticum</i>                    | 764        | 873        | 1577       | 1410       | 813        | 537        | 1172       | 1150       |
| <i>Trillium tschonoskii</i>                      | 824        | 892        | 1489       | 1386       | 665        | 494        | 1144       | 1126       |
| <i>Ulmus macrocarpa</i>                          | 295        | 396        | 729        | 862        | 434        | 466        | 602        | 641        |
| <i>Vaccinium koreanum</i>                        | 600        | 541        | 1167       | 1151       | 567        | 610        | 862        | 792        |
| <i>Vicia bungei</i>                              | 133        | 143        | 135        | 218        | 2          | 75         | 134        | 181        |
| <i>Viola albida</i>                              | 288        | 289        | 627        | 602        | 339        | 313        | 458        | 446        |
| <i>Viola diamantica</i>                          | 340        | 339        | 1177       | 1143       | 837        | 805        | 819        | 805        |
| <i>Viola variegata</i>                           | 216        | 213        | 573        | 467        | 357        | 254        | 379        | 354        |
| <i>Waldsteinia ternata</i>                       | 214        | 228        | 1349       | 1330       | 1135       | 1102       | 816        | 836        |
| <i>Weigela florida</i>                           | 178        | 241        | 1134       | 975        | 956        | 734        | 559        | 479        |
| <i>Weigela subsessilis</i>                       | 192        | 222        | 351        | 346        | 159        | 124        | 292        | 286        |
| <i>Wistaria floribunda</i>                       | 52         | 101        | 710        | 527        | 658        | 426        | 323        | 306        |
| <i>Youngia chelidoniifoli</i>                    | 238        | 295        | 1075       | 897        | 837        | 602        | 574        | 549        |
| <i>Zanthoxylum piperitum</i>                     | 179        | 153        | 269        | 199        | 90         | 45         | 228        | 177        |
| <b>Mean</b>                                      | <b>394</b> | <b>397</b> | <b>950</b> | <b>890</b> | <b>556</b> | <b>493</b> | <b>663</b> | <b>642</b> |

S2 Table 2. Distance between occurrence points for each species.

The third column is the number of original resolution (1 km) climate-based raster cells where each species' occurrence points are located. The fourth column is a count of number of climate grid cells that were sampled by more than one occurrence point, which is a signal of possible bias introduced into a species model due to pseudoreplication. When considering species on an individual basis, we recommend discounting the eight species with fewer than five occurrence points that also have one climate grid which was sampled twice.

| <i>species</i>                               | <i># of occurrence points</i> | <i># of raster cells the points are found in</i> | <i># possible replicates</i> | <i>Minimum Distance (km)</i> | <i>Maximum Distance (km)</i> | <i>Mean Distance (km)</i> |
|----------------------------------------------|-------------------------------|--------------------------------------------------|------------------------------|------------------------------|------------------------------|---------------------------|
| <b>Mean</b>                                  |                               |                                                  |                              | <b>25.40</b>                 | <b>174.08</b>                | <b>92.62</b>              |
| <i>Cardamine lyrate</i>                      | 2                             | 1                                                | 1                            | 0.24                         | 0.24                         | 0.24                      |
| <i>Thalictrum rochebrunianum</i>             | 2                             | 2                                                | 0                            | 0.27                         | 0.27                         | 0.27                      |
| <i>Leontopodium coreanum</i>                 | 2                             | 2                                                | 0                            | 5.73                         | 5.73                         | 5.73                      |
| <i>Lilium callosum</i>                       | 2                             | 2                                                | 0                            | 6.22                         | 6.22                         | 6.22                      |
| <i>Deutzia paniculata</i>                    | 2                             | 2                                                | 0                            | 8.06                         | 8.06                         | 8.06                      |
| <i>Iris koreana</i>                          | 2                             | 2                                                | 0                            | 8.79                         | 8.79                         | 8.79                      |
| <i>Pimpinella brachycarpa</i>                | 2                             | 2                                                | 0                            | 9.32                         | 9.32                         | 9.32                      |
| <i>Calanthe discolor</i>                     | 2                             | 2                                                | 0                            | 9.58                         | 9.58                         | 9.58                      |
| <i>Sedum zokuriense</i>                      | 2                             | 2                                                | 0                            | 9.65                         | 9.65                         | 9.65                      |
| <i>Chionanthus retusa</i>                    | 2                             | 2                                                | 0                            | 10.02                        | 10.02                        | 10.02                     |
| <i>Quercus serrata</i>                       | 2                             | 2                                                | 0                            | 11.72                        | 11.72                        | 11.72                     |
| <i>Pleuropterus cilinervis</i>               | 2                             | 2                                                | 0                            | 11.79                        | 11.79                        | 11.79                     |
| <i>Pinus pumila</i>                          | 2                             | 2                                                | 0                            | 13.78                        | 13.78                        | 13.78                     |
| <i>Saussurea eriophylla</i>                  | 2                             | 2                                                | 0                            | 13.89                        | 13.89                        | 13.89                     |
| <i>Loranthus tanakae</i>                     | 2                             | 2                                                | 0                            | 13.99                        | 13.99                        | 13.99                     |
| <i>Syneilesis palmata</i>                    | 2                             | 2                                                | 0                            | 14.20                        | 14.20                        | 14.20                     |
| <i>Carpinus coreana</i>                      | 2                             | 2                                                | 0                            | 16.08                        | 16.08                        | 16.08                     |
| <i>Bistorta alopecuroides</i>                | 2                             | 2                                                | 0                            | 19.86                        | 19.86                        | 19.86                     |
| <i>Echinosophora koreensis</i>               | 2                             | 2                                                | 0                            | 19.87                        | 19.87                        | 19.87                     |
| <i>Rosa davurica</i>                         | 2                             | 2                                                | 0                            | 32.34                        | 32.34                        | 32.34                     |
| <i>Ilex cornuta</i>                          | 2                             | 2                                                | 0                            | 41.51                        | 41.51                        | 41.51                     |
| <i>Larix gmelini var principisruprechtii</i> | 2                             | 2                                                | 0                            | 49.18                        | 49.18                        | 49.18                     |
| <i>Adenophora grandiflora</i>                | 2                             | 2                                                | 0                            | 51.48                        | 51.48                        | 51.48                     |
| <i>Aegopodium alpestre</i>                   | 2                             | 2                                                | 0                            | 77.08                        | 77.08                        | 77.08                     |
| <i>Magnolia kobus</i>                        | 2                             | 2                                                | 0                            | 105.97                       | 105.97                       | 105.97                    |
| <i>Viola albidia</i>                         | 2                             | 2                                                | 0                            | 110.63                       | 110.63                       | 110.63                    |
| <i>Pinellia tripartia</i>                    | 2                             | 2                                                | 0                            | 118.93                       | 118.93                       | 118.93                    |
| <i>Carex ligulata var. austrokoreensis</i>   | 2                             | 2                                                | 0                            | 128.11                       | 128.11                       | 128.11                    |
| <i>Corydalis grandicalyx</i>                 | 2                             | 2                                                | 0                            | 128.21                       | 128.21                       | 128.21                    |
| <i>Trientalis europaea</i>                   | 2                             | 2                                                | 0                            | 141.03                       | 141.03                       | 141.03                    |
| <i>Crataegus komarovii</i>                   | 2                             | 2                                                | 0                            | 145.58                       | 145.58                       | 145.58                    |
| <i>Vicia bungei</i>                          | 2                             | 2                                                | 0                            | 148.79                       | 148.79                       | 148.79                    |
| <i>Isopyrum mandshuricum</i>                 | 2                             | 2                                                | 0                            | 150.38                       | 150.38                       | 150.38                    |
| <i>Aconitum chiisanense</i>                  | 2                             | 2                                                | 0                            | 186.20                       | 186.20                       | 186.20                    |
| <i>Delphinium maackianum</i>                 | 2                             | 2                                                | 0                            | 210.55                       | 210.55                       | 210.55                    |
| <i>Lonicera sachalinensis</i>                | 2                             | 2                                                | 0                            | 213.21                       | 213.21                       | 213.21                    |
| <i>Ranunculus kazusensis</i>                 | 2                             | 2                                                | 0                            | 216.09                       | 216.09                       | 216.09                    |
| <i>Poa viridula</i>                          | 2                             | 2                                                | 0                            | 222.44                       | 222.44                       | 222.44                    |
| <i>Asarum maculatum</i>                      | 2                             | 2                                                | 0                            | 225.81                       | 225.81                       | 225.81                    |
| <i>Syringa velutina var. kamibayashii</i>    | 2                             | 2                                                | 0                            | 249.52                       | 249.52                       | 249.52                    |
| <i>Allium victorialis var. platyphyllum</i>  | 2                             | 2                                                | 0                            | 253.65                       | 253.65                       | 253.65                    |
| <i>Cymbidium nipponicum</i>                  | 2                             | 2                                                | 0                            | 261.67                       | 261.67                       | 261.67                    |
| <i>Abies koreana</i>                         | 3                             | 2                                                | 1                            | 0.13                         | 266.54                       | 177.71                    |
| <i>Cephalotaxus koreana</i>                  | 3                             | 2                                                | 1                            | 0.34                         | 72.58                        | 48.39                     |

|                                                     |   |   |   |        |        |        |
|-----------------------------------------------------|---|---|---|--------|--------|--------|
| <i>Machilus thunbergii</i>                          | 3 | 3 | 0 | 0.54   | 1.55   | 1.04   |
| <i>Arisaema heterophyllum</i>                       | 3 | 3 | 0 | 1.83   | 47.50  | 31.89  |
| <i>Anemone narcissiflora</i>                        | 3 | 3 | 0 | 3.34   | 13.47  | 9.39   |
| <i>Daphne kamschatica</i>                           | 3 | 3 | 0 | 3.55   | 6.18   | 5.30   |
| <i>Acer mono</i>                                    | 3 | 3 | 0 | 3.93   | 280.67 | 187.72 |
| <i>Filipendula formosa</i>                          | 3 | 3 | 0 | 3.98   | 41.89  | 27.94  |
| <i>Clematis brachyura</i>                           | 3 | 3 | 0 | 4.32   | 12.49  | 8.55   |
| <i>Polygonatum stenophyllum</i>                     | 3 | 3 | 0 | 5.01   | 10.66  | 7.34   |
| <i>Weigela subsessilis</i>                          | 3 | 3 | 0 | 5.38   | 11.94  | 8.11   |
| <i>Zanthoxylum piperitum</i>                        | 3 | 3 | 0 | 8.55   | 17.27  | 12.17  |
| <i>Rosa marretii</i>                                | 3 | 3 | 0 | 10.02  | 37.06  | 26.57  |
| <i>Tilia taquetii</i>                               | 3 | 3 | 0 | 11.94  | 19.71  | 17.07  |
| <i>Iris ensata</i> var. <i>spontanea</i>            | 3 | 3 | 0 | 12.53  | 150.60 | 100.79 |
| <i>Cymbidium goeringii</i>                          | 3 | 3 | 0 | 15.23  | 21.07  | 18.65  |
| <i>Spiraea miyabei</i>                              | 3 | 3 | 0 | 17.05  | 188.20 | 127.70 |
| <i>Halenia corniculata</i>                          | 3 | 3 | 0 | 18.31  | 57.39  | 40.87  |
| <i>Forsythia saxatilis</i>                          | 3 | 3 | 0 | 18.49  | 136.47 | 91.42  |
| <i>Isopyrum raddeanum</i>                           | 3 | 3 | 0 | 23.56  | 195.33 | 134.41 |
| <i>Carex kujujana</i>                               | 3 | 3 | 0 | 23.70  | 92.25  | 66.68  |
| <i>Prunus maackii</i>                               | 3 | 3 | 0 | 33.14  | 51.15  | 41.90  |
| <i>Lonicera vesicaria</i>                           | 3 | 3 | 0 | 43.67  | 143.22 | 107.21 |
| <i>Saussurea calcicola</i>                          | 3 | 3 | 0 | 50.79  | 98.15  | 75.71  |
| <i>Lonicera harai</i>                               | 3 | 3 | 0 | 59.84  | 243.63 | 176.18 |
| <i>Rhamnus parvifolia</i>                           | 3 | 3 | 0 | 61.45  | 79.22  | 69.14  |
| <i>Cremastra appendiculata</i>                      | 3 | 3 | 0 | 73.50  | 297.01 | 221.42 |
| <i>Lonicera subhispidata</i>                        | 3 | 3 | 0 | 108.44 | 228.10 | 185.52 |
| <i>Monotropa hypopithys</i>                         | 3 | 3 | 0 | 146.32 | 164.14 | 154.64 |
| <i>Deutzia coreana</i>                              | 4 | 3 | 1 | 0.15   | 14.23  | 8.27   |
| <i>Allium senescens</i>                             | 4 | 3 | 1 | 0.16   | 99.54  | 54.84  |
| <i>Thymus quinquecostatus</i>                       | 4 | 3 | 1 | 0.24   | 121.28 | 91.25  |
| <i>Forsythia ovata</i>                              | 4 | 3 | 1 | 0.27   | 73.33  | 37.24  |
| <i>Youngia chelidoniifoli</i>                       | 4 | 4 | 0 | 0.36   | 5.80   | 3.74   |
| <i>Sapium japonicum</i>                             | 4 | 4 | 0 | 0.57   | 20.46  | 12.83  |
| <i>Sanguisorba hakusanensis</i>                     | 4 | 4 | 0 | 2.13   | 161.73 | 88.74  |
| <i>Monotropa uniflora</i>                           | 4 | 4 | 0 | 2.34   | 187.81 | 124.44 |
| <i>Astragalus membranaceus</i>                      | 4 | 4 | 0 | 3.18   | 208.01 | 130.08 |
| <i>Populus maximowiczii</i>                         | 4 | 4 | 0 | 4.33   | 73.34  | 44.25  |
| <i>Disporum sessile</i>                             | 4 | 4 | 0 | 4.73   | 217.83 | 143.63 |
| <i>Cardamine koreana</i>                            | 4 | 4 | 0 | 5.02   | 53.58  | 29.84  |
| <i>Cirsium vlassovianum</i>                         | 4 | 4 | 0 | 6.86   | 42.79  | 24.51  |
| <i>Scrophularia koraiensis</i>                      | 4 | 4 | 0 | 9.43   | 140.39 | 73.99  |
| <i>Torreya nucifera</i>                             | 4 | 4 | 0 | 10.38  | 111.36 | 68.77  |
| <i>Galium boreale</i> var. <i>vulgare</i>           | 4 | 4 | 0 | 11.53  | 49.22  | 29.70  |
| <i>Thalictrum coreanum</i>                          | 4 | 4 | 0 | 13.25  | 159.46 | 115.20 |
| <i>Ulmus macrocarpa</i>                             | 4 | 4 | 0 | 15.05  | 188.00 | 123.10 |
| <i>Clintonia udensis</i>                            | 4 | 4 | 0 | 22.99  | 169.00 | 105.82 |
| <i>Iris savatieri</i>                               | 4 | 4 | 0 | 39.95  | 208.78 | 135.32 |
| <i>Wistaria floribunda</i>                          | 4 | 4 | 0 | 53.64  | 276.14 | 194.39 |
| <i>Jeffersonia dubia</i>                            | 4 | 4 | 0 | 73.97  | 323.28 | 197.60 |
| <i>Cirsium setidens</i>                             | 5 | 5 | 0 | 0.12   | 204.67 | 87.40  |
| <i>Cnidium tachiroei</i>                            | 5 | 4 | 1 | 0.66   | 288.89 | 135.26 |
| <i>Leontopodium japonicum</i>                       | 5 | 5 | 0 | 0.71   | 173.33 | 103.06 |
| <i>Paeonia japonica</i>                             | 5 | 5 | 0 | 1.24   | 289.68 | 179.37 |
| <i>Bupleurum euphorbioides</i>                      | 5 | 5 | 0 | 2.72   | 150.38 | 61.59  |
| <i>Clematis chiisanensis</i>                        | 5 | 5 | 0 | 2.95   | 48.19  | 22.46  |
| <i>Dianthus superbus</i> var. <i>longicalycinus</i> | 5 | 5 | 0 | 4.29   | 215.19 | 90.07  |
| <i>Hemerocallis middendorfil</i>                    | 5 | 5 | 0 | 4.35   | 194.48 | 117.73 |
| <i>Waldsteinia ternata</i>                          | 5 | 5 | 0 | 7.00   | 132.80 | 63.62  |
| <i>Dryopteris crassirhizoma</i>                     | 5 | 5 | 0 | 7.45   | 130.38 | 56.72  |

|                                                  |    |    |   |       |        |        |
|--------------------------------------------------|----|----|---|-------|--------|--------|
| <i>Corydalis maculata</i>                        | 5  | 5  | 0 | 10.01 | 96.78  | 43.72  |
| <i>Salvia chanroenica</i>                        | 5  | 5  | 0 | 18.52 | 225.70 | 129.78 |
| <i>Dipsacus japonicus</i>                        | 5  | 5  | 0 | 24.38 | 191.16 | 108.27 |
| <i>Melampyrum setaceum</i> var. <i>nakaianum</i> | 6  | 6  | 0 | 0.24  | 212.56 | 114.27 |
| <i>Chrysosplenium ramosum</i>                    | 6  | 5  | 1 | 0.25  | 174.05 | 87.84  |
| <i>Vaccinium koreanum</i>                        | 6  | 6  | 0 | 0.27  | 211.62 | 89.41  |
| <i>Leontice microrhyncha</i>                     | 6  | 5  | 1 | 0.35  | 111.87 | 59.73  |
| <i>Megaleranthis saniculifolia</i>               | 6  | 6  | 0 | 0.80  | 93.92  | 58.85  |
| <i>Silene koreana</i>                            | 6  | 6  | 0 | 4.48  | 189.73 | 67.39  |
| <i>Campylotropis macrocarpa</i>                  | 6  | 6  | 0 | 4.75  | 139.89 | 65.22  |
| <i>Clematis patens</i>                           | 6  | 6  | 0 | 5.58  | 204.60 | 119.85 |
| <i>Moehringia lateriflora</i>                    | 6  | 6  | 0 | 7.93  | 246.83 | 95.49  |
| <i>Eurya japonica</i>                            | 6  | 6  | 0 | 10.09 | 214.78 | 111.66 |
| <i>Trillium tschonoskii</i>                      | 6  | 6  | 0 | 13.90 | 125.99 | 61.22  |
| <i>Sanguisorba longifolia</i>                    | 6  | 6  | 0 | 20.75 | 328.42 | 203.16 |
| <i>Scabiosa mansenensis</i>                      | 7  | 7  | 0 | 0.09  | 325.14 | 170.76 |
| <i>Angelica tenuissima</i>                       | 7  | 5  | 2 | 0.12  | 242.86 | 126.03 |
| <i>Koelreuteria paniculata</i>                   | 7  | 6  | 1 | 0.29  | 205.29 | 90.84  |
| <i>Abelia coreana</i>                            | 7  | 7  | 0 | 0.54  | 155.19 | 82.33  |
| <i>Ajuga spectabilis</i>                         | 7  | 7  | 0 | 0.84  | 212.64 | 106.92 |
| <i>Lonicera chrysantha</i>                       | 7  | 7  | 0 | 1.44  | 361.44 | 191.80 |
| <i>Patrinia rupestris</i>                        | 7  | 7  | 0 | 10.04 | 278.37 | 146.14 |
| <i>Bupleurum falcatum</i>                        | 7  | 7  | 0 | 14.51 | 225.29 | 112.60 |
| <i>Aconitum koreanum</i>                         | 7  | 7  | 0 | 20.72 | 371.73 | 156.18 |
| <i>Viola variegata</i>                           | 8  | 7  | 1 | 0.10  | 306.94 | 85.56  |
| <i>Sedum rotundifolium</i>                       | 8  | 6  | 2 | 0.12  | 19.04  | 8.89   |
| <i>Iris ruthenica</i>                            | 8  | 7  | 1 | 0.16  | 247.68 | 121.75 |
| <i>Weigela florida</i>                           | 8  | 8  | 0 | 0.41  | 288.82 | 77.11  |
| <i>Rhododendron brachycarpum</i>                 | 8  | 7  | 1 | 0.41  | 112.31 | 53.47  |
| <i>Sorbus amurensis</i>                          | 8  | 7  | 1 | 0.78  | 311.14 | 154.34 |
| <i>Crypsinus hastatus</i>                        | 8  | 8  | 0 | 1.25  | 203.94 | 114.40 |
| <i>Pulsatilla koreana</i>                        | 8  | 8  | 0 | 3.31  | 135.70 | 60.43  |
| <i>Cirsium chanroenicum</i>                      | 8  | 8  | 0 | 13.78 | 188.43 | 103.81 |
| <i>Thuja orientalis</i>                          | 8  | 8  | 0 | 29.16 | 268.82 | 153.80 |
| <i>Convallaria keiskei</i>                       | 9  | 8  | 1 | 0.14  | 210.67 | 102.46 |
| <i>Thuja koraiensis</i>                          | 9  | 9  | 0 | 3.13  | 154.51 | 56.37  |
| <i>Lysimachia coreana</i>                        | 9  | 9  | 0 | 12.81 | 295.67 | 144.67 |
| <i>Aconitum trilobum</i>                         | 10 | 10 | 0 | 0.67  | 126.28 | 66.04  |
| <i>Hovenia dulcis</i>                            | 10 | 9  | 1 | 0.70  | 306.92 | 134.40 |
| <i>Schizopepon bryoniaefolius</i>                | 10 | 10 | 0 | 2.51  | 50.72  | 24.57  |
| <i>Cypripedium macranthum</i>                    | 11 | 9  | 2 | 0.14  | 269.65 | 134.25 |
| <i>Buxus microphylla</i> var. <i>koreana</i>     | 11 | 10 | 1 | 0.60  | 228.46 | 75.85  |
| <i>Eranthis stellata</i>                         | 11 | 11 | 0 | 0.89  | 264.00 | 140.67 |
| <i>Acer barbinerve</i>                           | 11 | 11 | 0 | 1.77  | 160.35 | 74.98  |
| <i>Celtis chosoniana</i>                         | 12 | 11 | 1 | 0.10  | 225.45 | 112.99 |
| <i>Rhododendron tschonoskii</i>                  | 12 | 11 | 1 | 0.53  | 82.45  | 36.04  |
| <i>Taxus cuspidata</i>                           | 12 | 12 | 0 | 0.57  | 235.58 | 70.87  |
| <i>Equisetum hyemale</i>                         | 12 | 12 | 0 | 1.04  | 110.82 | 37.81  |
| <i>Paulownia coreana</i>                         | 12 | 12 | 0 | 5.92  | 326.94 | 158.12 |
| <i>Epimedium koreanum</i>                        | 13 | 13 | 0 | 0.30  | 181.51 | 70.12  |
| <i>Symplocarpus renifolius</i>                   | 13 | 13 | 0 | 1.09  | 298.49 | 146.93 |
| <i>Prunus davidiana</i>                          | 13 | 13 | 0 | 19.59 | 345.49 | 162.94 |
| <i>Lonicera subsessilis</i>                      | 14 | 14 | 0 | 0.80  | 350.81 | 145.83 |
| <i>Sorbus commixta</i>                           | 14 | 14 | 0 | 3.98  | 323.95 | 110.94 |
| <i>Angelica gigas</i>                            | 15 | 15 | 0 | 1.18  | 251.32 | 100.64 |
| <i>Saxifraga punctata</i>                        | 15 | 15 | 0 | 1.72  | 288.54 | 154.30 |
| <i>Smilacina bicolor</i>                         | 16 | 12 | 4 | 0.10  | 321.63 | 134.36 |
| <i>Oplopanax elatus</i>                          | 16 | 15 | 1 | 0.25  | 313.33 | 129.15 |
| <i>Paeonia obovata</i>                           | 17 | 15 | 2 | 0.10  | 289.52 | 136.01 |

|                                   |    |    |    |      |        |        |
|-----------------------------------|----|----|----|------|--------|--------|
| <i>Symplocarpus nipponicus</i>    | 17 | 15 | 2  | 0.15 | 328.54 | 94.50  |
| <i>Acer ukurunduense</i>          | 17 | 17 | 0  | 0.44 | 145.65 | 54.77  |
| <i>Euonymus pauciflorus</i>       | 17 | 17 | 0  | 8.48 | 349.54 | 159.59 |
| <i>Spiraea salicifolia</i>        | 18 | 18 | 0  | 0.10 | 282.48 | 111.74 |
| <i>Disporum ovale</i>             | 18 | 17 | 1  | 0.52 | 315.76 | 132.28 |
| <i>Tricyrtis dilatata</i>         | 18 | 17 | 1  | 0.54 | 337.89 | 131.97 |
| <i>Acanthopanax chiisanensis</i>  | 18 | 17 | 1  | 0.63 | 296.57 | 147.94 |
| <i>Acer tegmentosum</i>           | 19 | 19 | 0  | 0.22 | 214.61 | 73.93  |
| <i>Filipendula glaberrima</i>     | 19 | 19 | 0  | 2.90 | 248.93 | 103.61 |
| <i>Lilium cernuum</i>             | 20 | 18 | 2  | 0.11 | 293.33 | 105.34 |
| <i>Anemone koraiensis</i>         | 20 | 18 | 2  | 0.13 | 258.45 | 89.60  |
| <i>Nymphoides peltata</i>         | 20 | 13 | 7  | 0.20 | 19.02  | 5.56   |
| <i>Hanabusaya asiatica</i>        | 20 | 20 | 0  | 0.38 | 115.49 | 50.62  |
| <i>Trillium kamschaticum</i>      | 21 | 20 | 1  | 0.21 | 174.04 | 62.47  |
| <i>Aristolochia contorta</i>      | 21 | 21 | 0  | 1.66 | 291.16 | 132.83 |
| <i>Rhododendron micranthum</i>    | 22 | 21 | 1  | 0.13 | 118.49 | 53.64  |
| <i>Corylopsis coreana</i>         | 23 | 19 | 4  | 0.13 | 397.43 | 69.55  |
| <i>Stewartia koreana</i>          | 23 | 21 | 2  | 0.23 | 161.50 | 62.56  |
| <i>Iris odaesanensis</i>          | 24 | 22 | 2  | 0.26 | 285.80 | 89.85  |
| <i>Scopolia japonica</i>          | 25 | 21 | 4  | 0.09 | 320.21 | 135.89 |
| <i>Phellodendron amurense</i>     | 25 | 22 | 3  | 0.18 | 261.68 | 104.59 |
| <i>Patrina saniculaefolia</i>     | 26 | 26 | 0  | 0.35 | 384.06 | 135.12 |
| <i>Aristolochia manshuriensis</i> | 28 | 24 | 4  | 0.05 | 211.39 | 87.61  |
| <i>Berchemia berchemiaefolia</i>  | 29 | 17 | 12 | 0.06 | 127.16 | 15.34  |
| <i>Ilex macropoda</i>             | 29 | 23 | 6  | 0.11 | 278.57 | 102.20 |
| <i>Lilium distichum</i>           | 30 | 29 | 1  | 0.23 | 371.35 | 152.07 |
| <i>Syringa wolffi</i>             | 31 | 30 | 1  | 0.11 | 340.76 | 100.68 |
| <i>Anemone reflexa</i>            | 31 | 31 | 0  | 0.45 | 245.55 | 103.39 |
| <i>Prunus yedoensis</i>           | 32 | 16 | 16 | 0.07 | 316.12 | 64.65  |
| <i>Hylomecon hylomeconoides</i>   | 35 | 27 | 8  | 0.08 | 89.69  | 31.50  |
| <i>Gastrodia elata</i>            | 37 | 36 | 1  | 0.16 | 397.26 | 149.77 |
| <i>Viola diamantica</i>           | 37 | 37 | 0  | 0.73 | 255.42 | 83.73  |
| <i>Dicentra spectabilis</i>       | 39 | 33 | 6  | 0.11 | 266.04 | 126.55 |
| <i>Codonopsis lanceolata</i>      | 49 | 42 | 7  | 0.08 | 338.26 | 116.02 |
| <i>Rodgersia podophylla</i>       | 59 | 55 | 4  | 0.09 | 333.02 | 102.99 |
| <i>Cimicifuga heracleifolia</i>   | 65 | 59 | 6  | 0.08 | 411.56 | 138.64 |
| <i>Kalopanax pictus</i>           | 69 | 66 | 3  | 0.13 | 427.44 | 146.24 |
